# Supplementary material
Source: publisher site journal article supplement (https://www.dovepress.com/article/418533)
Supplement: Supplementary file 1 [file get_supplementary_file.php]

**Supplemental files**


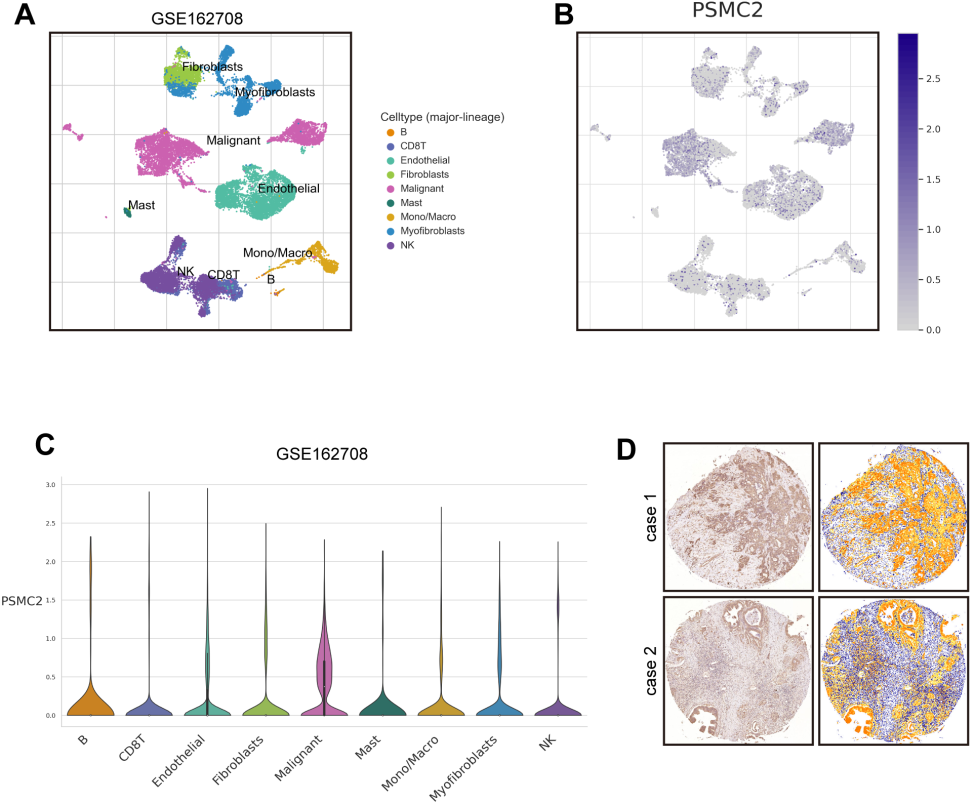


**Figure S1. Expression pattern of PSMC2 in pancreatic cancer.** (A) Visualization of cell types in the GSE162708 dataset. (B, C) Expression of PSMC2 in different cell types and quantitative statistics. (D) Expression of PSMC2 in tumor and stromal areas.


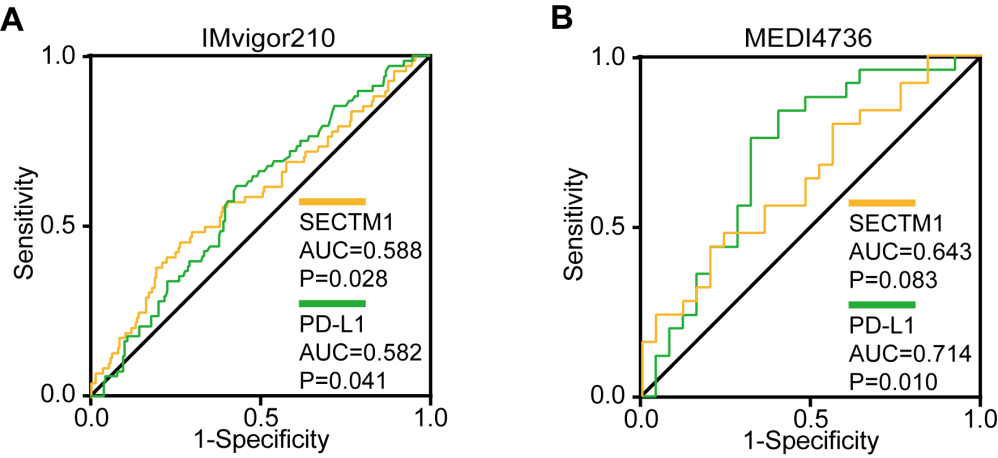


**Figure S2. ROC analysis of PSMC2 in predicting immunotherapy responses.** (A) The IMvigor210 cohort. (B) The MEDI4736 cohort.

**Table S1. Summary of abbreviations in the TCGA dataset.**

| Abbreviation | Full name |
| --- | --- |
| ACC | adrenocortical carcinoma |
| BLCA | bladder urothelial carcinoma |
| BRCA | breast invasive carcinoma |
| CESC | cervical & endocervical cancer |
| CHOL | cholangio carcinoma |
| COAD | colon adenocarcinoma |
| DLBC | lymphoid neoplasm diffuse large B-cell lymphoma |
| ESCA | esophageal carcinoma |
| GBM | glioblastoma multiforme |
| HNSC | head and neck squamous cell carcinoma |
| KICH | kidney chromophobe carcinoma |
| KIRC | kidney renal clear cell carcinoma |
| KIRP | kidney renal papillary cell carcinoma |
| LAML | acute myeloid leukemia |
| LGG | brain lower grade glioma |
| LIHC | liver hepatocellular carcinoma |
| LUAD | lung adenocarcinoma |
| LUSC | lung squamous cell carcinoma |
| MESO | mesothelioma |
| OV | ovarian serous cystadenocarcinoma |
| PAAD | pancreatic adenocarcinoma |
| PCPG | pheochromocytoma and paraganglioma |
| PRAD | prostate adenocarcinoma |
| READ | rectum adenocarcinoma |
| SARC | sarcoma |
| SKCM | skin cutaneous melanoma |
| STAD | stomach adenocarcinoma |
| TGCT | testicular germ cell tumors |
| THCA | thyroid carcinoma |
| THYM | thymoma |
| UCEC | uterine corpus endometrial carcinoma |
| UCS | uterine carcinosarcoma |
| UVM | uveal melanoma |

**Table S2. The association between PSMC2 expression and clinical characteristics**

| Clinical characteristics | | Case | PSMC2 expression | | Chi-squared value | P value |
| --- | --- | --- | --- | --- | --- | --- |
| low | high |
| Gender | Female | 25 | 16 | 9 | 2.611 | 0.106 |
|  | Male | 35 | 15 | 20 |  |  |
| Age | ≤70 | 38 | 19 | 19 | 0.115 | 0.734 |
|  | >70 | 22 | 12 | 10 |  |  |
| Grade | Medium-well | 33 | 21 | 12 | 4.207 | **0.040** |
|  | Poor | 27 | 10 | 17 |  |  |
| Clinical stage | Stage 1 | 12 | 7 | 5 | 0.424 | 0.515 |
| Stage 2-4 | 44 | 21 | 23 |  |  |
| Survival status | Alive | 14 | 11 | 3 | 5.293 | **0.021** |
| Dead | 46 | 20 | 26 |  |  |

**Note**: Bold values indicate statistical difference.
